# Supplementary material
Source: publisher figshare collection journal article supplement (https://gsapubs.figshare.com/ndownloader/files/23291342)
Supplement: Supplementary file 1 [file 23291342]

Table DR1: OSL results,  $D_e$  breakup for Paran samples.

| Lab No. | Grain size ( $\mu\text{m}$ ) | Aliquot size (mm) | No. of discs | $D_e$ (Gy)      |
|---------|------------------------------|-------------------|--------------|-----------------|
| PS-40   | 74-105                       | 5                 | 9            | $1.55 \pm 0.18$ |
|         | 150-177                      | 5                 | 9            | $1.54 \pm 0.44$ |
|         | 150-177                      | 2                 | 23           | $1.38 \pm 0.74$ |
| PS-41   | 88-125                       | 5                 | 13           | $6.1 \pm 1.3$   |
|         | 88-125                       | 2                 | 22           | $4.9 \pm 1.2$   |
| PS-42   | 74-105                       | 5                 | 9            | $18.3 \pm 2.8$  |
|         | 150-177                      | 5                 | 9            | $21.0 \pm 9.1$  |
|         | 150-177                      | 2                 | 24           | $21.9 \pm 10.4$ |
| PS-43   | 74-105                       | 5                 | 9            | $35.9 \pm 11.4$ |
|         | 150-177                      | 5                 | 9            | $37.7 \pm 12.2$ |
|         | 150-177                      | 2                 | 22           | $32.0 \pm 15.8$ |
| PS-44   | 88-125                       | 5                 | 13           | $66.5 \pm 20.7$ |
|         | 88-125                       | 2                 | 24           | $50.2 \pm 23.8$ |
| PS-45   | 74-105                       | 5                 | 9            | $76.8 \pm 16.9$ |
|         | 150-177                      | 5                 | 9            | $83.4 \pm 32.9$ |
|         | 150-177                      | 2                 | 24           | $93.7 \pm 54.3$ |
| PS-46   | 74-105                       | 5                 | 9            | $112 \pm 23$    |
|         | 150-177                      | 5                 | 9            | $120 \pm 34$    |
| PS-48   | 74-105                       | 5                 | 9            | $185 \pm 59$    |
|         | 150-177                      | 5                 | 9            | $215 \pm 58$    |

$D_e$  values for different grain sizes or aliquot sizes. The 2 mm aliquots were measured using a standardized growth curve based on the average of 5 aliquots.

The averages presented here are unweighted means. In Table 1 the central age model (Galbraith et al. 1999) was used to calculate the most representative  $D_e$  from all measurements.

Table DR2: Luminescence ages for Har Harif samples (from Crouvi et al., 2009)

| Sample               | Depth (m) | K (%) | U (ppm) | Th (ppm) | Ext. $\alpha$ $\mu\text{Gy/a}$ | Ext. $\beta$ $\mu\text{Gy/a}$ | Ext. $\gamma$ + Cos. $\mu\text{Gy/a}$ | Cos. $\mu\text{Gy/a}$ | Total dose $\mu\text{Gy/a}$ | Aliquots used | D <sub>e</sub> (Gy) | Age (ka)                 |
|----------------------|-----------|-------|---------|----------|--------------------------------|-------------------------------|---------------------------------------|-----------------------|-----------------------------|---------------|---------------------|--------------------------|
| HR-1 <sup>(2)</sup>  | 0.15      | 1     | 2.5     | 6.4      | 12                             | 1155                          | 951                                   | -                     | 2118±99                     | 27/29         | 29.1±0.6            | <b>13.7±0.7</b>          |
| HR-13 <sup>(1)</sup> | 0.27      | 0.87  | 1.7     | 4.7      | 9                              | 923                           | 606                                   | 243                   | 1782±27                     | 11/12         | 44.6±1.1            | <b>25.1±0.7</b>          |
| HR-5                 | 0.40      | 0.96  | 0.9     | 5.6      | 7                              | 904                           | 1023                                  | -                     | 1934±105                    | 17/18         | 63.4±1.8            | <b>32.8±2.0</b>          |
| HR-6                 | 0.77      | 0.91  | 1.7     | 5.4      | 9                              | 968                           | 966                                   | -                     | 1943±100                    | 13/13         | 81.6±4.0            | <b>42.0±3.0</b>          |
| HR-2 <sup>(1)</sup>  | 0.90      | 1     | 1.7     | 5.5      | 9                              | 1007                          | 659                                   | 181                   | 1856±29                     | 18/18         | 90.2±2.7            | <b>48.6±2.7</b>          |
| HR-7                 | 1.65      | 0.95  | 1.8     | 5.4      | 9                              | 984                           | 903                                   | -                     | 1896±93                     | 13/13         | 117±4.2             | <b>61.5±3.8</b>          |
| HR-16                | 1.65      | 0.94  | 2.1     | 6.2      | 11                             | 1033                          | 929                                   | -                     | 1973±96                     | 12/12         | 127±3.2             | <b>64.4±3.6</b>          |
| HR-8                 | 1.90      | 0.67  | 1.6     | 4.4      | 8                              | 749                           | 760                                   | -                     | 1517±79                     | 8/13          | 117±5.0             | <b>77.4±5.2</b>          |
| HR-9                 | 2.35      | 0.67  | 1.7     | 5.0      | 8                              | 775                           | 779                                   | -                     | 1563±81                     | 13/13         | 118±6.7             | <b>72.5±5.8</b>          |
| HR-3 <sup>(1)</sup>  | 2.55      | 0.74  | 1.9     | 5.1      | 9                              | 849                           | 603                                   | 147                   | 1608±27                     | 11/18         | 147±3.9             | <b>91.3±2.9</b>          |
| HR-10                | 2.75      | 0.74  | 1.9     | 5.1      | 9                              | 849                           | 790                                   | -                     | 1648±83                     | 13/13         | 120±8.3             | <b>73.0±6.2</b>          |
| HR-4 <sup>(1)</sup>  | 2.95      | 0.7   | 2.1     | 5.2      | 10                             | 850                           | 620                                   | 135                   | 1615±27                     | 17/18         | 154±6.6             | <b>95.6±4.4</b>          |
| HR-11                | 3.05      | 0.78  | 2.0     | 5.6      | 10                             | 900                           | 803                                   | -                     | 1713±84                     | 7/13<br>6/13  | 225±10<br>357±15    | <b>131±8.7</b><br>208±13 |
| HR-12                | 3.45      | 0.57  | 1.5     | 3.6      | 7                              | 651                           | 685                                   | -                     | 1343±73                     | 12/13         | 242±4.5             | <b>181±10</b>            |
| HR-14                | 3.90      | 0.50  | 1.8     | 3.8      | 8                              | 646                           | 633                                   | -                     | 1287±67                     | 17/17         | 233±6.7             | <b>181±11</b>            |
| HR-15                | 4.30      | 0.46  | 1.8     | 3.5      | 8                              | 613                           | 590                                   | -                     | 1210±63                     | 12/12         | 395±22              | <b>326±25</b>            |

Horizontal lines separate between the different units. Water contents were estimated at 3±1 % for 0-1 m depth and 5±1 % below that. Gamma + cosmic dose rates were measured in the field using a portable gamma counter, except for samples marked with <sup>(1)</sup>, for which gamma was calculated from the radioelements and the cosmic dose estimated from burial depth. Measurements were carried out on 74-125  $\mu\text{m}$  quartz using a modified SAR protocol (Murray and Wintle, 2000). Preheat temperatures were 10 s at 200-260°C and cutheats for 5 s at 20° below preheat temperature. Preheat plateaus are overall adequate. Recycling ratios are mostly within ±5% of unity, and the contribution of infrared stimulated luminescence to the OSL signal is <5%. Average D<sub>e</sub> and errors were calculated using the Central Age Model (Galbreith et al., 1999). “Aliquots used” are the number of aliquots used from those measured for calculating the average D<sub>e</sub>. Samples HR-7 and HR-16 are duplicates, taken from the same horizon 30 cm apart. Sample HR-11 is at the contact between 2 units and exhibit a bi-modal D<sub>e</sub> distribution; both modes are presented. Sample HR-14 was measured using the OSL and the ITL signals (180±11 ka and 183±13 ka, respectively). The D<sub>e</sub> and age presented here is the data combined from the two measurement protocols.
